# Supplementary material
Source: publisher figshare collection journal article supplement (https://springernature.figshare.com/ndownloader/files/14353775)
Supplement: Supplementary file [file 14353775]

**A**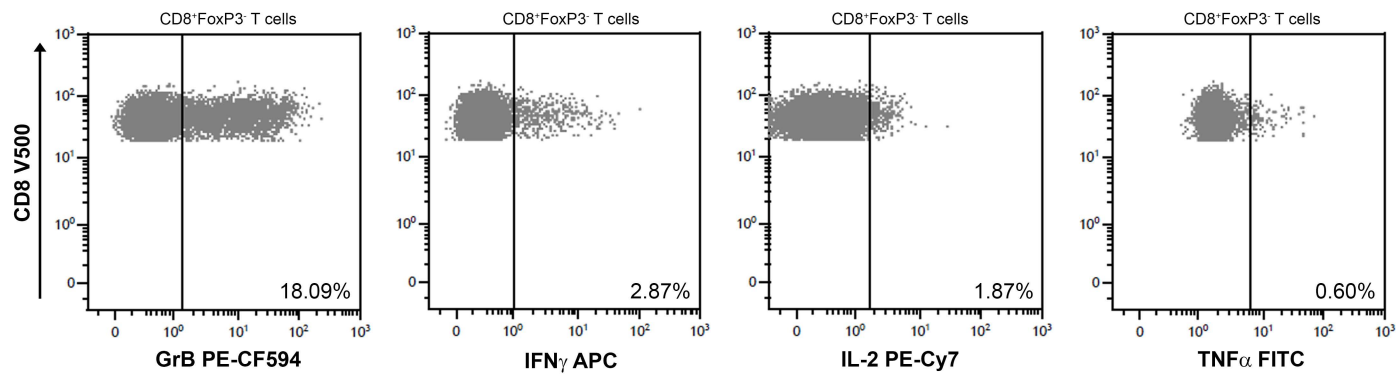**B**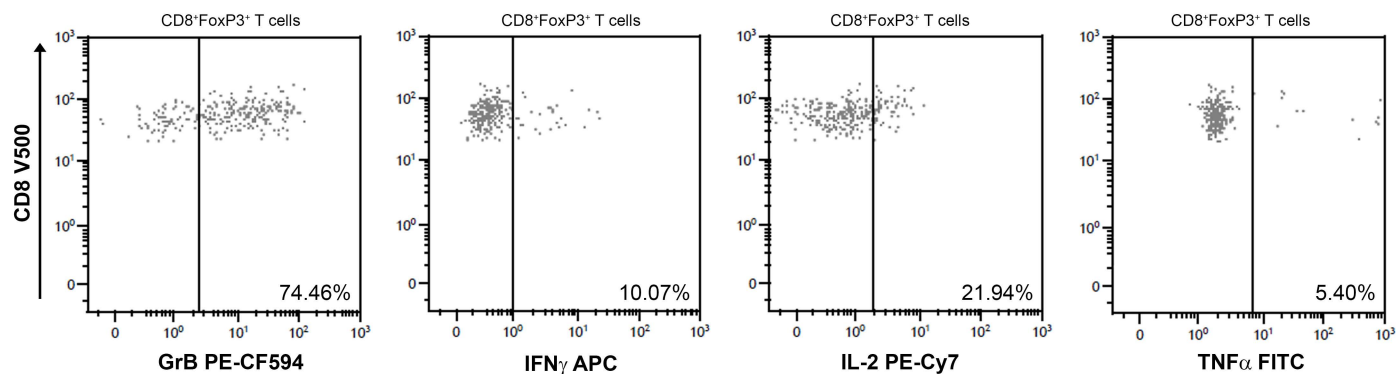**C**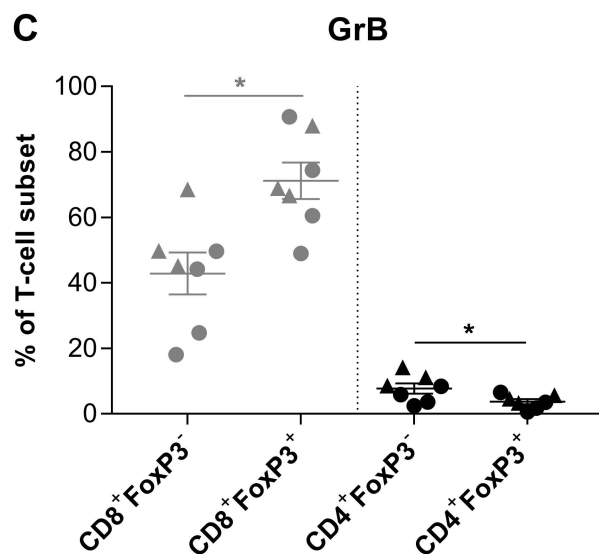**D**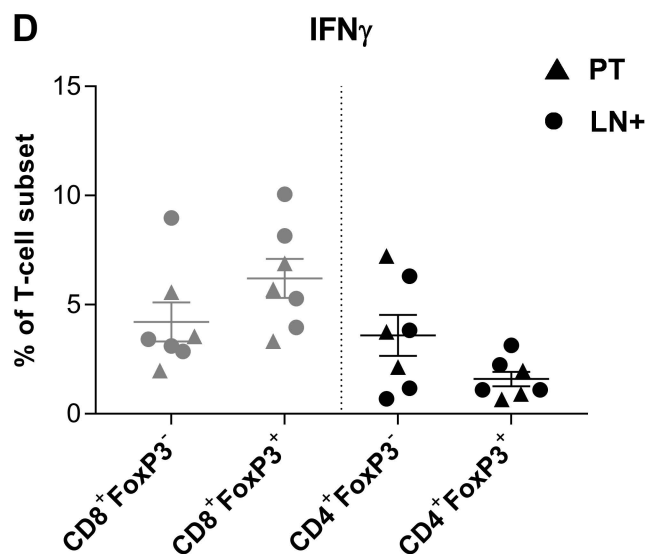**E**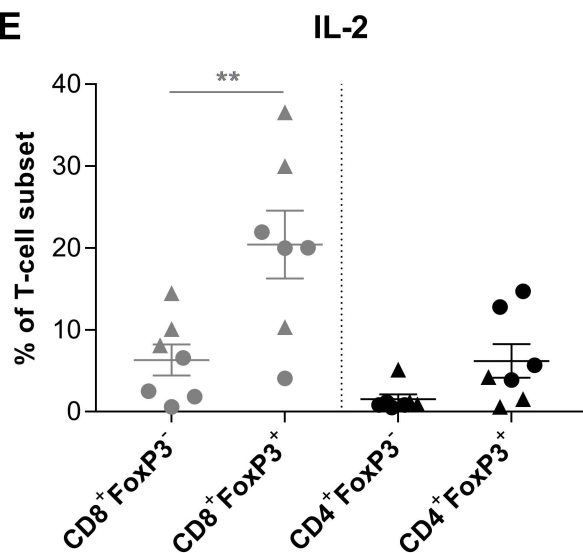**F**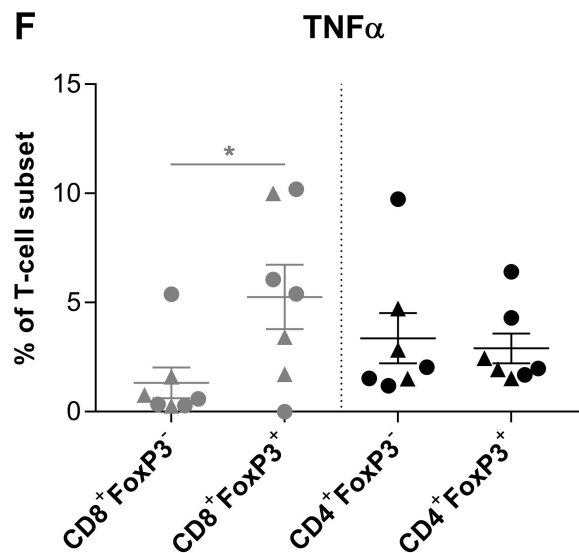

**Supplementary Figure 4. Cytokine expression upon anti-CD3 stimulation: CD8<sup>+</sup> vs. CD4<sup>+</sup> T cells.** Dot plots showing representative gates for intracellular cytokines GrB, IFN $\gamma$ , IL-2, and TNF $\alpha$  in **(A)** CD8<sup>+</sup>FoxP3<sup>-</sup> T cells and in **(B)** CD8<sup>+</sup>FoxP3<sup>+</sup> T cells present in LN+. Frequency of CD8<sup>+</sup> (grey) vs. CD4<sup>+</sup> (black, including Treg) T cells expressing intracellular **(C)** GrB, **(D)** IFN $\gamma$ , **(E)** IL-2, and **(F)** TNF $\alpha$  upon o/n anti-CD3 stimulation in LN+ ( $n=4$ ) and PT ( $n=3$ ) samples. Error bars represent standard error of the mean. \* $P=0.01$  to  $0.05$ , \*\* $P=0.001$  to  $0.01$ .
